# Supplementary material for: CULLIN-3 Controls TIMELESS Oscillations in the Drosophila Circadian Clock
Source: PubMed Central journal article supplement (PMC3413713; doi:10.1371/journal.pbio.1001367), 2012-08-07

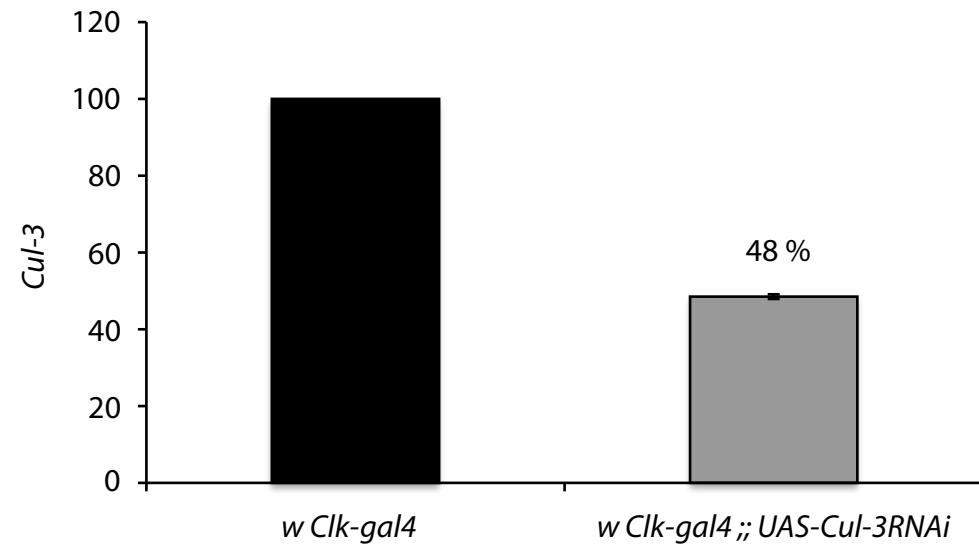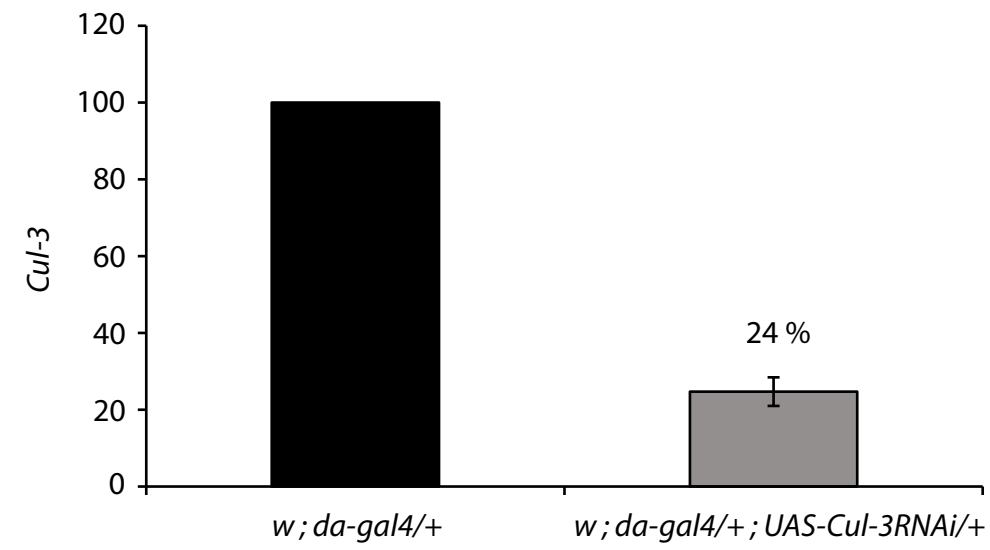

Supplement: pbio.1001367.s002.pdf [file pbio.1001367.s002.pdf]
