# Supplementary material for: CULLIN-3 Controls TIMELESS Oscillations in the Drosophila Circadian Clock
Source: PubMed Central journal article supplement (PMC3413713; doi:10.1371/journal.pbio.1001367), 2012-08-07

*w; timgal4; UAS-flag-Cul-3<sup>K717R</sup>/+*

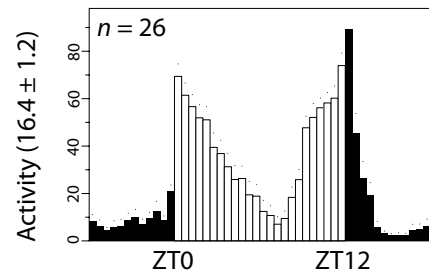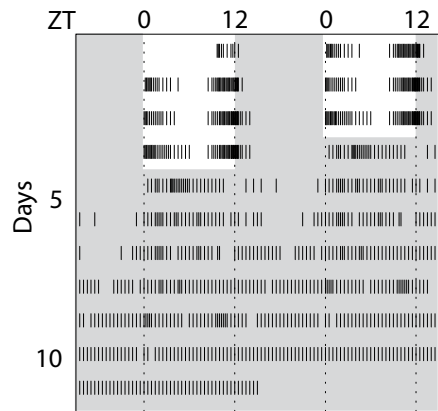

*w; tim-gal4; UAS-Cul-3<sup>ΔC</sup>*

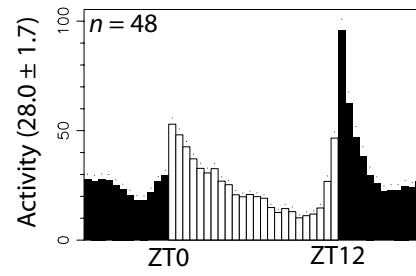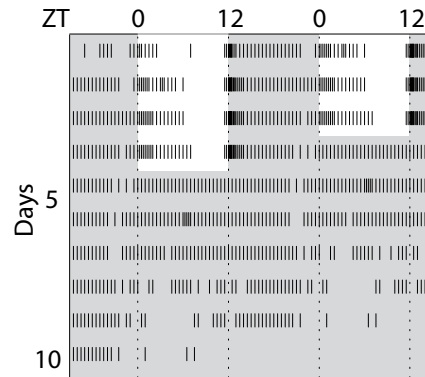

*w; tim-gal4; UAS-gfp-Cul-3*

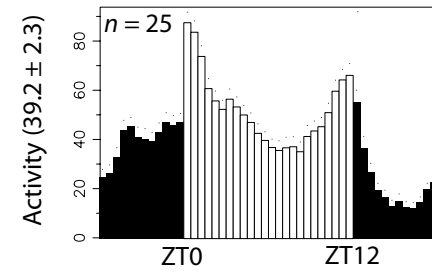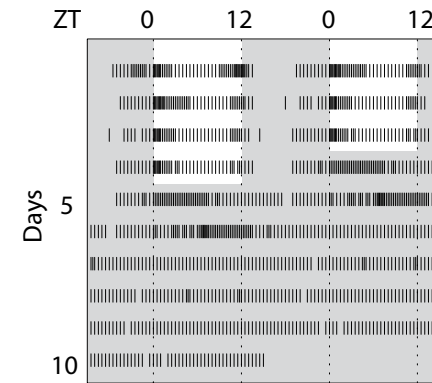

Supplement: pbio.1001367.s003.pdf [file pbio.1001367.s003.pdf]
