# Supplementary material for: CULLIN-3 Controls TIMELESS Oscillations in the Drosophila Circadian Clock
Source: PubMed Central journal article supplement (PMC3413713; doi:10.1371/journal.pbio.1001367), 2012-08-07
Supplement: pbio.1001367.s008.pdf [file pbio.1001367.s008.pdf]

DD1

PER

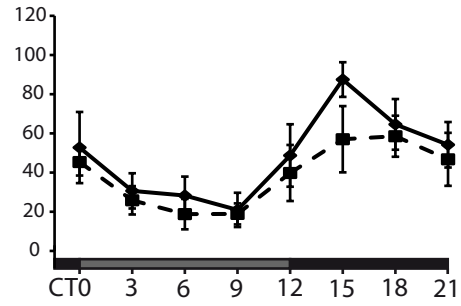

DD2

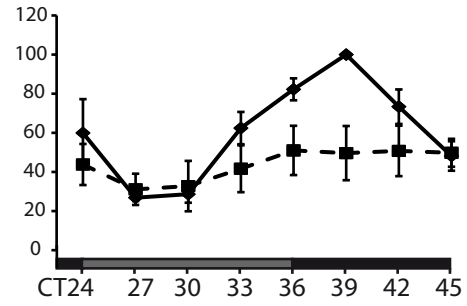

P-PER

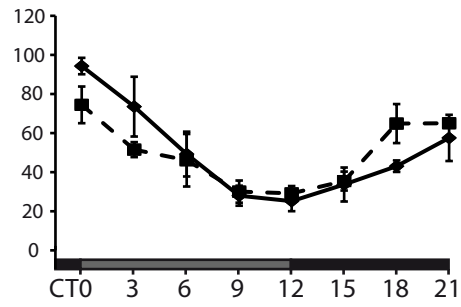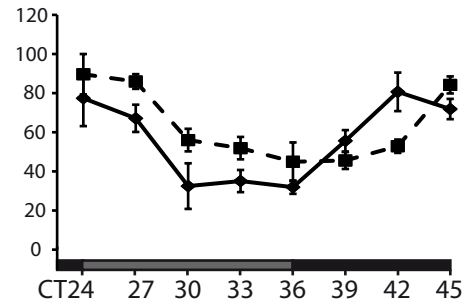

TIM

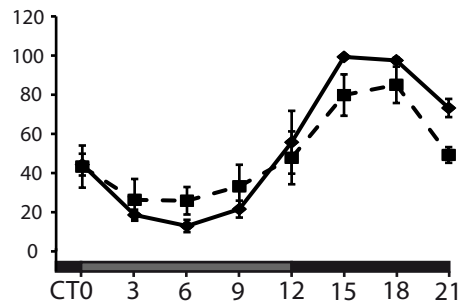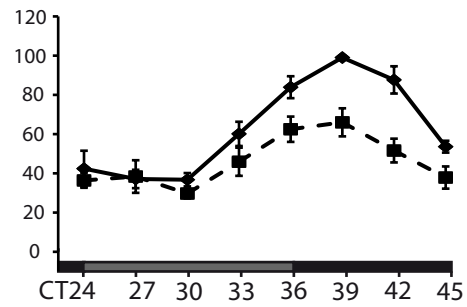

P-TIM

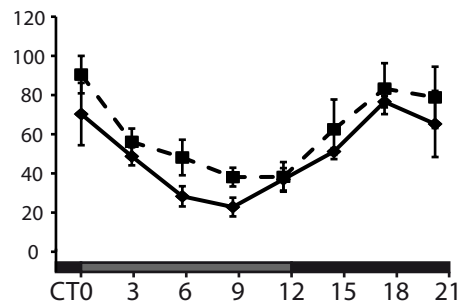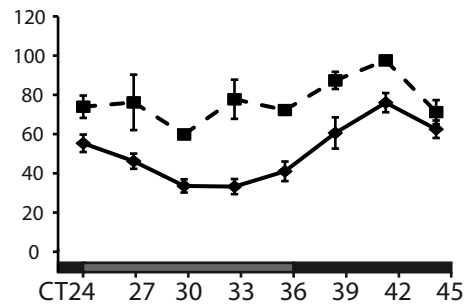

—◆— *w; tim-gal4*  
 -■- *w; tim-gal4; UAS-gfp-Cul-3<sup>K717R</sup>*
