# Supplementary material for: CULLIN-3 Controls TIMELESS Oscillations in the Drosophila Circadian Clock
Source: PubMed Central journal article supplement (PMC3413713; doi:10.1371/journal.pbio.1001367), 2012-08-07
Supplement: pbio.1001367.s009.pdf [file pbio.1001367.s009.pdf]

*w; tim-gal4*

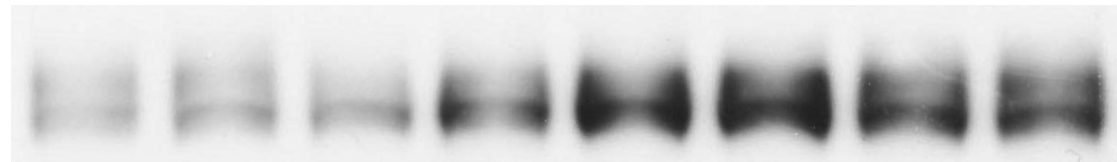

← P-TIM  
← TIM

*w; tim-gal4; UAS-flag-Cul-3<sup>K717R</sup>/+*

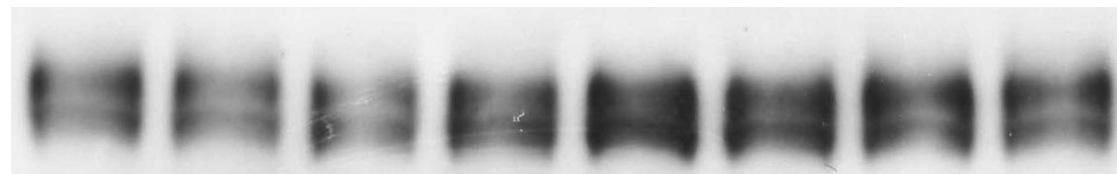

← P-TIM  
← TIM

CT24 27 30 33 36 39 42 45
