# Supplementary material for: CULLIN-3 Controls TIMELESS Oscillations in the Drosophila Circadian Clock
Source: PubMed Central journal article supplement (PMC3413713; doi:10.1371/journal.pbio.1001367), 2012-08-07

*w; tim-gal4*

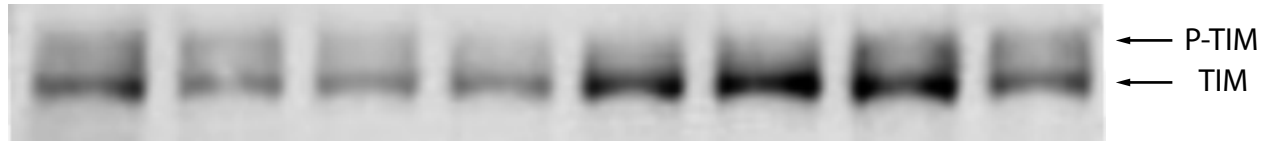

*w; tim-gal4; UAS-gfp-Cul-3<sup>K717R</sup>*

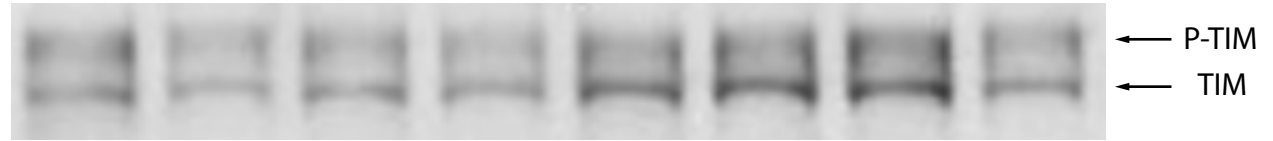

*w; tim-gal4; UAS-gfp-Cul-3*

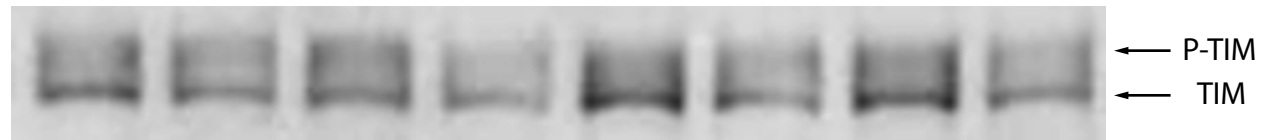

CT24 27 30 33 36 39 42 45

TIM

P-TIM

—■— *w; tim-gal4*  
—▲— *w; tim-gal4; UAS-gfp-Cul-3*

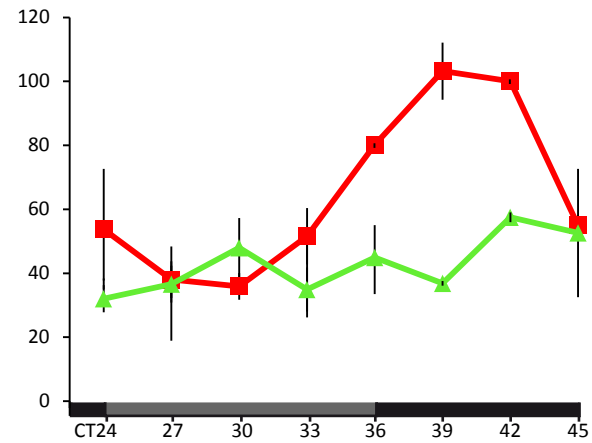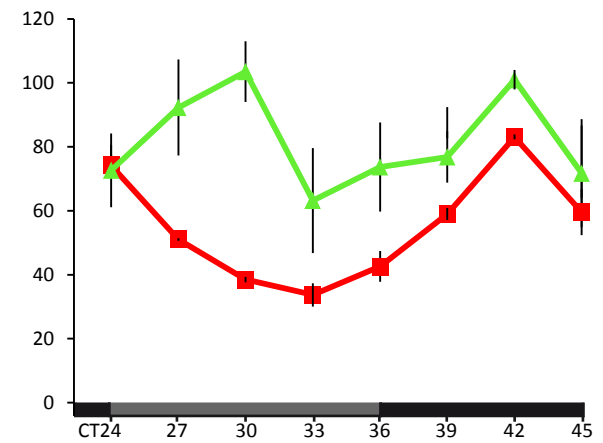

Supplement: pbio.1001367.s011.pdf [file pbio.1001367.s011.pdf]
